# Supplementary material for: Low level laser therapy (Photobiomodulation therapy) for breast cancer-related lymphedema: a systematic review
Source: Springer Nature journal article supplement (doi:10.1186/s12885-017-3852-x), 2017-12-01
Supplement: MOESM1 [file 15287320]

## **Additional file 1. Search strategy**

### **1.1. PubMed (from inception to November 5<sup>th</sup>, 2016)**

|                                      |         |
|--------------------------------------|---------|
| (1) laser [MeSH Terms]               | 44,582  |
| (2) laser therapy [MeSH Terms]       | 53,144  |
| (3) laser light [MeSH Terms]         | 13,104  |
| (4) cold laser [MeSH Terms]          | 415     |
| (5) low-energy laser [MeSH Terms]    | 297     |
| (6) low-intensity laser [MeSH Terms] | 306     |
| (7) low-level laser [MeSH Terms]     | 1,453   |
| (8) photobiomodulation [MeSH Terms]  | 0       |
| (9) or/(1)-(8)                       | 92,858  |
| (10) lymphedema [MeSH Terms]         | 10,273  |
| (11) lymphoedema [MeSH Terms]        | 10,273  |
| (12) swelling [MeSH Terms]           | 38,980  |
| (13) edema [MeSH Terms]              | 38,980  |
| (14) oedema [MeSH Terms]             | 38,980  |
| (15) or/(10)-(14)                    | 48,771  |
| (16) breast cancer [MeSH Terms]      | 243,481 |
| (17) (9) and (15) and (16)           | 14      |

### **1.2. AMED via Ovid Interface (from inception to November 5<sup>th</sup>, 2016)**

|                              |     |
|------------------------------|-----|
| (1) laser.mp.                | 910 |
| (2) laser therapy. mp.       | 308 |
| (3) laser light. mp.         | 21  |
| (4) cold laser. mp.          | 4   |
| (5) low-energy laser. mp.    | 12  |
| (6) low-intensity laser. mp. | 22  |
| (7) low-level laser. mp.     | 118 |

|                             |       |
|-----------------------------|-------|
| (8) photobiomodulation. mp. | 2     |
| (9) or/(1)-(8)              | 910   |
| (10) lymphedema. mp.        | 275   |
| (11) lymphoedema. mp.       | 116   |
| (12) swelling. mp.          | 632   |
| (13) edema. mp.             | 886   |
| (14) oedema. mp.            | 331   |
| (15) or/(10)-(14)           | 1,948 |
| (16) breast cancer. mp.     | 1,317 |
| (17) (9) and (15) and (16)  | 3     |

### 1.3. Web of Science (from inception to November 5<sup>th</sup>, 2016)

|                              |         |
|------------------------------|---------|
| (1) TS=(laser)               | 842,338 |
| (2) TS=(laser therapy)       | 31,185  |
| (3) TS=(laser light)         | 115,063 |
| (4) TS=(cold laser)          | 7,961   |
| (5) TS=(low-energy laser)    | 6,013   |
| (6) TS=(low-intensity laser) | 2,349   |
| (7) TS=(low-level laser)     | 5,000   |
| (8) TS=(photobiomodulation)  | 616     |
| (9) or/(1)-(8)               | 842,489 |
| (10) TS=(lymphedema)         | 6,413   |
| (11) TS=(lymphoedema)        | 1,635   |
| (12) TS=(swelling)           | 117,461 |
| (13) TS=(edema)              | 87,437  |
| (14) TS=(oedema)             | 101,352 |
| (15) or/(10)-(14)            | 219,988 |
| (16) TS=(breast cancer)      | 434,706 |

(17) (9) and (15) and (16) 59

**1.4. CNKI (from inception to November 5<sup>th</sup>, 2016), search conducted in Chinese**

|                                     |         |
|-------------------------------------|---------|
| (1) 主题 (topic): 激光 (laser)          | 273,648 |
| (2) 主题 (topic): 水肿 (edema)          | 121,080 |
| (3) 主题 (topic): 乳腺癌 (breast cancer) | 96,272  |
| (4) (1) and (2) and (3)             | 10      |
